# Supplementary material for: Specialization of Gene Expression during Mouse Brain Development
Source: PLoS Comput Biol. 2013 Sep 19;9(9):e1003185. doi: 10.1371/journal.pcbi.1003185 (PMC3777910; doi:10.1371/journal.pcbi.1003185)
Supplement: Table S2 — The neural regions used for the developing brain and the adult brain. (XLSX) [file pcbi.1003185.s005.xlsx]

## Sheet: neural regions
Developing brain regions		Adult brain regions
roof plate of evaginated telencephalic vesicle		Frontal pole, cerebral cortex
subpallium		Somatomotor areas
ventral pallium		Somatosensory areas
lateral pallium		Infralimbic area
parietal cortex		Gustatory areas
occipital cortex		Visceral area
temporal cortex		Auditory areas
insular cortex		Visual areas
cingulate cortex		Anterior cingulate area
medial pallium (hippocampal allocortex)		Prelimbic area
pallial septum		Orbital area
preoptic telencephalon		Agranular insular area
telencephalo-hypothalamic transition area		Retrosplenial area
peduncular (caudal) hypothalamus		Posterior parietal association areas
prethalamus		Temporal association areas
prethalamic tegmentum		Perirhinal area
thalamus		Ectorhinal area
thalamic tegmentum		Main olfactory bulb
pretectum		Accessory olfactory bulb
pretectal tegmentum		Anterior olfactory nucleus
collicular (rostral) midbrain tectum		Taenia tecta
m1 (rostral) midbrain tegmentum		Dorsal peduncular area
preisthmic midbrain tectum		Piriform area
preisthmic tegmentum		Nucleus of the lateral olfactory tract
isthmus		Cortical amygdalar area
rhombomere 1		Piriform-amygdalar area
rhombomere 2		Postpiriform transition area
rhombomere 3		Hippocampal region
rhombomere 4		Retrohippocampal region
rhombomere 5		Cortical subplate
rhombomere 6		Striatum
rhombomere 7		Pallidum
rhombomere 8		Cerebellar cortex
rhombomere 9		Cerebellar nuclei
rhombomere 10		Thalamus
rhombomere 11		Hypothalamus
		Midbrain, sensory related
		Midbrain, motor related
		Midbrain, behavioral state related
		Pons
		Medulla
