# Supplementary material for: Specialization of Gene Expression during Mouse Brain Development
Source: PLoS Comput Biol. 2013 Sep 19;9(9):e1003185. doi: 10.1371/journal.pcbi.1003185 (PMC3777910; doi:10.1371/journal.pcbi.1003185)
Supplement: Table S3 — Neural-related parent GO categories. GO categories that were used to screen the GO hierarchy for categories related to nervous system development, structure and function. We used these categories and all of their descendants in the GO tree. (XLSX) [file pcbi.1003185.s006.xlsx]

## Sheet: Sheet1
GO ID	GO name
GO:0050877	neurological system process
GO:0007399	nervous system development
GO:0070997	neuron death
GO:0070050	neuron homeostasis
GO:0043005	neuron projection
GO:0043025	neuronal cell body
GO:0045202	synapse
GO:0044456	synapse part
GO:0043209	myelin sheath
GO:0072534	perineuronal net
GO:0019717	synaptosome
