# Supplementary material for: Specialization of Gene Expression during Mouse Brain Development
Source: PLoS Comput Biol. 2013 Sep 19;9(9):e1003185. doi: 10.1371/journal.pcbi.1003185 (PMC3777910; doi:10.1371/journal.pcbi.1003185)
Supplement: Table S4 — Functional enrichment of single gene dissimilarity profiles. List of GO categories that were found to be enriched in clusters showing embryonic or post natal high dissimilarity. (XLSX) [file pcbi.1003185.s007.xlsx]

## Sheet: Sheet1
GO ID	GO category name	EMBRYONIC / POST-NATAL	# CATEGORY GENES IN CLUSTER	# GENES IN CLUSTER	PVALUE (raw)	PVALUE (FDR corrected)	GENE NAMES
GO:0001764	neuron migration	E	4	11	7.5725e-05	0.00212053	Arx; Cxcr4; Neurog2; Pax6
GO:0007411	axon guidance	E	7	22	4.04067e-05	0.00247395	Arx; Cxcr4; Lhx2; Lmx1a; Neurog2; Otx2; Pax6
GO:0007420	brain development	E	6	22	2.84504e-06	0.000452361	Cxcr4; Eomes; Id4; Lhx2; Lmx1a; Pax6
GO:0007611	learning or memory	P	8	59	0.000439193	0.00835412	Cnr1; Egr1; Gria1; Grin2b; Grm4; Grm5; S100b; Slc6a1
GO:0010975	regulation of neuron projection development	E	4	8	6.66376e-05	0.00706359	Fez1; Mapt; Pafah1b1; Pou3f2
GO:0021952	central nervous system projection neuron axonogenesis	E	4	25	3.73594e-06	0.000396009	Dcx; Ephb1; Ephb2; Nr2e1
GO:0030182	neuron differentiation	E	8	22	2.3698e-06	0.000904721	Dlx2; En1; Eomes; Id4; Lhx2; Lmx1a; Neurog2; Otx2
GO:0030900	forebrain development	E	4	11	5.315e-05	0.00265067	Arx; Neurog2; Otx2; Pax6
GO:0030902	hindbrain development	E	3	14	9.33654e-05	0.00989673	Gbx2; Nfib; Tbr1
GO:0048167	regulation of synaptic plasticity	P	10	70	2.84117e-07	6.02329e-05	Agt; Calb1; Camk2a; Egr1; Gria1; Grik2; Grin2b; Grm5; Kit; S100b
GO:0048168	regulation of neuronal synaptic plasticity	P	8	70	4.55873e-07	6.44301e-05	Agt; Camk2a; Egr1; Grik2; Grin2b; Grm5; Kit; S100b
GO:0048169	regulation of long-term neuronal synaptic plasticity	P	7	70	6.67847e-07	7.07917e-05	Agt; Egr1; Grik2; Grin2b; Grm5; Kit; S100b
GO:0048663	neuron fate commitment	E	3	11	0.000406534	0.00861851	Dlx2; Otx2; Pax6
GO:0048666	neuron development	E	3	8	0.000349941	0.00991626	En1; Neurog2; Pax6
GO:0050804	regulation of synaptic transmission	P	16	70	2.22155e-08	1.88387e-05	Agt; Calb1; Camk2a; Cnr1; Egr1; Gria1; Grik2; Grin2b; Grm1; Grm5; Kcnc3; Kit; Ppp3ca; S100b; Slc6a1; Stx1a
GO:0050890	cognition	P	10	70	7.75204e-05	0.0049303	Adcy1; Chrna4; Cnr1; Egr1; Gria1; Grin2b; Grm5; Kit; S100b; Slc6a1
GO:0060078	regulation of postsynaptic membrane potential	P	5	59	0.000472874	0.00835412	Chrna4; Glra1; Grid2; Grin2b; Ppp3ca
