# Supplementary material for: Specialization of Gene Expression during Mouse Brain Development
Source: PLoS Comput Biol. 2013 Sep 19;9(9):e1003185. doi: 10.1371/journal.pcbi.1003185 (PMC3777910; doi:10.1371/journal.pcbi.1003185)
Supplement: Table S7 — Genes with a high contribution to cerebellar specialization. List of genes that are in the top 20 contribution values for the developmental post-natal time points (P4, P14, P28). The genes are sorted by their total contribution at these time points. The number of time points where the genes appeared in the top-20 list is also included. (XLSX) [file pcbi.1003185.s010.xlsx]

## Sheet: Sheet1
RANK	GENE	#APPERANCES	TOTAL CONTRIBUTION AT POST-NATAL TIME POINTS
1	Neurod1	3	0.0859
2	Zic1	3	0.0749
3	Zic5	2	0.0582
4	Slc1a3	3	0.0553
5	Pvalb	2	0.0453
6	Hoxa13	1	0.0415
7	Itpr1	3	0.037
8	Hmgn2	1	0.0352
9	Gdf10	2	0.0334
10	Grm4	1	0.0319
11	Calb1	3	0.0297
12	Dbi	2	0.0293
13	Grid2	2	0.0251
14	Pcp4	1	0.0215
15	Slc1a6	2	0.021
16	Nhlh2	2	0.021
17	Hnrpab	1	0.0199
18	Mfap4	2	0.0175
19	Id2	2	0.0153
20	Hmgn1	1	0.0151
21	Slc6a1	1	0.0127
22	Nfix	1	0.0121
23	Aqp4	1	0.0106
24	Tnc	1	0.0104
25	Actb	1	0.00993
26	Igsf4b	1	0.00958
27	C230009H10Rik	1	0.00956
28	Cbln3	1	0.00948
29	Rcor2	1	0.00878
30	Plxnb2	1	0.00835
31	Reln	1	0.00824
32	Cadps2	1	0.00758
33	Slc17a7	1	0.00735
34	Hap1	1	0.00702
35	Cnr1	1	0.00695
36	Hod	1	0.00645
37	Rora	1	0.00632
38	Kit	1	0.00624
39	Cerk	1	0.00618
40	Ahi1	1	0.00613
41	Camk4	1	0.0061
